# Supplementary material for: Nurturing 21st century physician knowledge, skills and attitudes with medical home innovations: the Wright Center for Graduate Medical Education teaching health center curriculum experience
Source: PeerJ. 2015 Feb 10;3:e766. doi: 10.7717/peerj.766 (PMC4327443; doi:10.7717/peerj.766)
Supplement: Table S4 — Longitudinal ACGME core competencies mean scores of 2011 THC residents comparisons to baseline. [file peerj-03-766-s007.docx]

**Supplemental Table 4**

| ACGME competencies | December 2011 | June 2012 | aP value | December 2012 | bP value | June 2014 | cP value |
| --- | --- | --- | --- | --- | --- | --- | --- |
| Interpersonal and communication skills | 4.1 (3.6 – 4.6) | 4.1 (3.7 – 4.4) | 0.956 | 4.2 (3.9 – 4.4) | 0.686 | 4.3 (3.8 – 4.6) | 0.191 |
| Medical knowledge | 3.9 (3.4 – 4.4) | 4.0 (3.5 – 4.3) | 0.568 | 4.1 (3.6 – 4.5) | 0.003 | 4.2 (3.6 – 4.6) | 0.008 |
| Patient care and procedural skills | 3.8 (3.4 – 4.2) | 3.9 (3.8 – 4.2) | 0.201 | 4.1 (3.8 – 4.4) | 0.012 | 4.2 (3.7 – 4.6) | 0.001 |
| Practice based learning | 3.8 (3.5 – 4.1) | 3.9 (3.6 – 4.1) | 0.201 | 4.1 (3.6 – 4.3) | 0.003 | 4.2 (3.7 – 4.6) | 0.002 |
| Professionalism | 4.1 (3.6 – 4.3) | 4.1 (3.7 – 4.3) | 1.000 | 4.3 (4.0 – 4.5) | 0.012 | 4.3 (3.8 – 4.6) | 0.004 |
| System based skills | 3.8 (3.5 – 4.1) | 3.9 (3.5 – 4.1) | 0.3001 | 4.1 (3.6 – 4.3) | 0.003 | 4.2 (3.7 – 4.6) | <0.001 |

**aDecember 2011 compared to June 2012**

**bDecember 2011 compared to December 2012**

**cDecember 2011 compared to June 2014**
